# Supplementary material for: Exploring views on medical care for people with intellectual disabilities: an international concept mapping study
Source: PubMed Central journal article supplement (PMC9295354; doi:10.1186/s12939-022-01700-w), 2022-07-19

**Supplemental Digital Content 3: Point map visualizing the relationship and proximity of statements to one another**

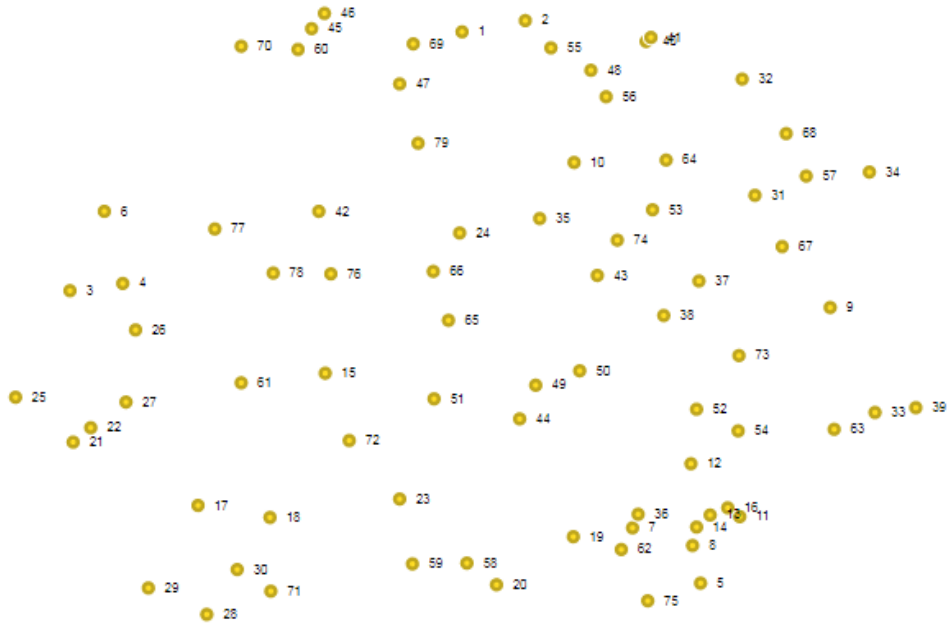

Supplement: 12939_2022_1700_MOESM3_ESM.pdf [file 12939_2022_1700_MOESM3_ESM.pdf]
